# Supplementary material
Source: PubMed Central journal article supplement (PMC5932233)
Supplement: NIHMS944701-supplement-1.pdf [file NIHMS944701-supplement-1.pdf]

## SUPPLEMENTALS

**Supplemental Table 1. 54 gene panel (N = 1 patient (1 sample)):** identifies potential tumor-related genomic alterations within 54 cancer-related genes including amplifications in *ERBB2*, *EGFR*, and *MET*. Only non-synonymous alterations were analyzed.

| <b>GENES WITH COMPLETE EXON COVERAGE</b>          |                    |                     |                     |                                                     |                   |
|---------------------------------------------------|--------------------|---------------------|---------------------|-----------------------------------------------------|-------------------|
| <i>ALK</i>                                        | <i>APC</i>         | <i>AR</i>           | <i>BRAF</i>         | 18 GENES<br><b>3 Copy Number Variations in BOLD</b> |                   |
| <i>CDKN2A</i>                                     | <b><i>EGFR</i></b> | <b><i>ERBB2</i></b> | <i>FBXW7</i>        |                                                     |                   |
| <i>KRAS</i>                                       | <b><i>MET</i></b>  | <i>MYC</i>          | <i>NOTCH1</i>       |                                                     |                   |
| <i>NRAS</i>                                       | <i>PIK3CA</i>      | <i>PTEN</i>         | <i>PROC</i>         |                                                     |                   |
| <i>RB1</i>                                        | <i>TP53</i>        |                     |                     |                                                     |                   |
| <b>GENES WITH CRITICAL EXON COVERAGE</b> 36 GENES |                    |                     |                     |                                                     |                   |
| <i>ABL1</i>                                       | <i>AKT1</i>        | <i>ATM</i>          | <i>CDH1</i>         | <i>CSF1R</i>                                        | <i>CTNNB1</i>     |
| <i>ERBB4</i>                                      | <i>EZH2</i>        | <i>FGFR1</i>        | <i>FGFR2</i>        | <i>FGFR3</i>                                        | <i>FLT3</i>       |
| <i>GNA11</i>                                      | <i>GNAQ</i>        | <i>GNAS</i>         | <i>HNF1A</i>        | <i>HRAS</i>                                         | <i>IDH1</i>       |
| <i>IDH2</i>                                       | <i>JAK2</i>        | <i>JAK3</i>         | <i>KDR</i>          | <i>KIT</i>                                          | <i>MLH1</i>       |
| <i>MPL</i>                                        | <i>NPM1</i>        | <i>PDGFRA</i>       | <i>PTPN11</i>       | <i>RET</i>                                          | <i>SMAD4</i>      |
| <b><i>SMARCB1</i></b>                             | <b><i>SMO</i></b>  | <b><i>SRC</i></b>   | <b><i>STK11</i></b> | <b><i>TERT</i></b>                                  | <b><i>VHL</i></b> |

**Supplemental Table 2. 68 gene panel (N = 23 patients (28 samples)), comprising amplifications in 16 genes as well as some fusions and indels. Only non-synonymous alterations were analyzed.**

| POINT MUTATIONS      |                      | AMPLIFICATIONS      | FUSIONS              | INDELS                                           |              |                                |
|----------------------|----------------------|---------------------|----------------------|--------------------------------------------------|--------------|--------------------------------|
| <i>AKT1</i>          | <i>ALK</i>           | <b><i>APC</i></b>   | <b><i>AR</i></b>     | <i>AR</i>                                        | <i>ALK</i>   | <i>EGFR</i> exon 19 deletions  |
| <i>AFAR</i>          | <b><i>ARID1A</i></b> | <i>ATM</i>          | <b><i>BRAF</i></b>   | <i>BRAF</i>                                      | <i>RET</i>   | <i>EGFR</i> exon 20 insertions |
| <b><i>BRCA1</i></b>  | <b><i>BRCA2</i></b>  | <b><i>CCND1</i></b> | <b><i>CCDN2</i></b>  | <i>CCNE1</i>                                     | <i>ROS1</i>  |                                |
| <b><i>CCNE1</i></b>  | <i>CDH1</i>          | <b><i>CDK4</i></b>  | <b><i>CDK6</i></b>   | <i>CDK4</i>                                      | <i>NTRK1</i> |                                |
| <b><i>CDKN2A</i></b> | <b><i>CDKN2B</i></b> | <i>CTNNB1</i>       | <b><i>EGFR</i></b>   | <i>CDK6</i>                                      |              |                                |
| <b><i>ERBB2</i></b>  | <i>ESR1</i>          | <i>EZH2</i>         | <i>FBXW7</i>         | <i>EGFR</i>                                      |              |                                |
| <b><i>FGFR1</i></b>  | <b><i>FGFR2</i></b>  | <i>FGFR3</i>        | <i>GATA3</i>         | <i>ERBB2</i>                                     |              |                                |
| <i>GNA11</i>         | <i>GNAQ</i>          | <i>GNAS</i>         | <i>HNF1A</i>         | <i>FGFR1</i>                                     |              |                                |
| <b><i>HRAS</i></b>   | <i>IDH1</i>          | <i>IDH2</i>         | <i>JAK2</i>          | <i>FGFR2</i>                                     |              |                                |
| <i>JAK3</i>          | <b><i>KIT</i></b>    | <b><i>KRAS</i></b>  | <i>MAP2K1</i>        | <i>KIT</i>                                       |              |                                |
| <i>MAP2K2</i>        | <b><i>MET</i></b>    | <i>MLH1</i>         | <i>MPL</i>           | <i>KRAS</i>                                      |              |                                |
| <b><i>MYC</i></b>    | <b><i>NF1</i></b>    | <i>NFE2L2</i>       | <i>NOTCH1</i>        | <i>MET</i>                                       |              |                                |
| <i>NPM1</i>          | <b><i>NRAS</i></b>   | <i>NTRK1</i>        | <b><i>PDGFRA</i></b> | <i>MYC</i>                                       |              |                                |
| <b><i>PIK3CA</i></b> | <b><i>PTEN</i></b>   | <i>PTPN11</i>       | <b><i>RAF1</i></b>   | <i>PDGFRA</i>                                    |              |                                |
| <i>RET</i>           | <i>RHEB</i>          | <i>RHOA</i>         | <i>RIT1</i>          | <i>PIK3CA</i>                                    |              |                                |
| <i>ROS1</i>          | <i>SMAD4</i>         | <i>SMO</i>          | <i>SRC</i>           | <i>RAF1</i>                                      |              |                                |
| <i>STK11</i>         | <i>TERT</i>          | <b><i>TP53</i></b>  | <i>VHL</i>           | *Complete exon coverage for genes in <b>bold</b> |              |                                |

**Supplemental Table 3: 70 gene panel (N = 3 patients (3 samples))**

| Complete Exon Sequencing             |              |              |               |               |               |                                        |               |                      |                     |
|--------------------------------------|--------------|--------------|---------------|---------------|---------------|----------------------------------------|---------------|----------------------|---------------------|
| Point Mutations (SNVs)<br>(70 Genes) |              |              |               |               |               | Amplifications<br>(CNVs)<br>(18 Genes) |               | Fusions<br>(6 Genes) | Indels<br>(3 Genes) |
| <i>AKT1</i>                          | <i>ALK</i>   | <i>APC</i>   | <i>AR</i>     | <i>ARAF</i>   | <i>ARID1A</i> | <i>AR</i>                              | <i>BRAF</i>   | <i>ALK</i>           | <i>EGFR*</i>        |
| <i>ATM</i>                           | <i>BRAF</i>  | <i>BRCA1</i> | <i>BRCA2</i>  | <i>CCND1</i>  | <i>CCND2</i>  | <i>CCND1</i>                           | <i>CCND2</i>  | <i>FGFR2</i>         | <i>ERBB2*</i>       |
| <i>CCNE1</i>                         | <i>CDH1</i>  | <i>CDK4</i>  | <i>CDK6</i>   | <i>CDKN2A</i> | <i>CDKN2B</i> | <i>CCNE1</i>                           | <i>CDK4</i>   | <i>FGFR3</i>         | <i>MET**</i>        |
| <i>CTNNB1</i>                        | <i>EGFR</i>  | <i>ERBB2</i> | <i>ESR1</i>   | <i>EZH2</i>   | <i>FBXW7</i>  | <i>CDK6</i>                            | <i>EGFR</i>   | <i>NTRK1</i>         |                     |
| <i>FGFR1</i>                         | <i>FGFR2</i> | <i>FGFR3</i> | <i>GATA3</i>  | <i>GNA11</i>  | <i>GNAQ</i>   | <i>ERBB2</i>                           | <i>FGFR1</i>  | <i>RET</i>           |                     |
| <i>GNAS</i>                          | <i>HNF1A</i> | <i>HRAS</i>  | <i>IDH1</i>   | <i>IDH2</i>   | <i>JAK2</i>   | <i>FGFR2</i>                           | <i>KIT</i>    | <i>ROS1</i>          |                     |
| <i>JAK3</i>                          | <i>KIT</i>   | <i>KRAS</i>  | <i>MAP2K1</i> | <i>MAP2K2</i> | <i>MET</i>    | <i>KRAS</i>                            | <i>MET</i>    |                      |                     |
| <i>MLH1</i>                          | <i>MPL</i>   | <i>MYC</i>   | <i>NF1</i>    | <i>NFE2L2</i> | <i>NOTCH1</i> | <i>MYC</i>                             | <i>PDGFRA</i> |                      |                     |
| <i>NPM1</i>                          | <i>NRAS</i>  | <i>NTRK1</i> | <i>PDGFRA</i> | <i>PIK3CA</i> | <i>PTEN</i>   | <i>PIK3CA</i>                          | <i>RAF1</i>   |                      |                     |
| <i>PTPN11</i>                        | <i>RAF1</i>  | <i>RB1</i>   | <i>RET</i>    | <i>RHEB</i>   | <i>RHOA</i>   |                                        |               |                      | *exons 19 & 20      |
| <i>RIT1</i>                          | <i>ROS1</i>  | <i>SMAD4</i> | <i>SMO</i>    | <i>SRC</i>    | <i>STK11</i>  |                                        |               |                      | **exon 14 skipping  |
| <i>TERT</i>                          | <i>TP53</i>  | <i>TSC1</i>  | <i>VHL</i>    |               |               |                                        |               |                      |                     |

**Supplemental Figure 1: Oncoprint of genomic alterations at the molecular level in 26 HCC patients**

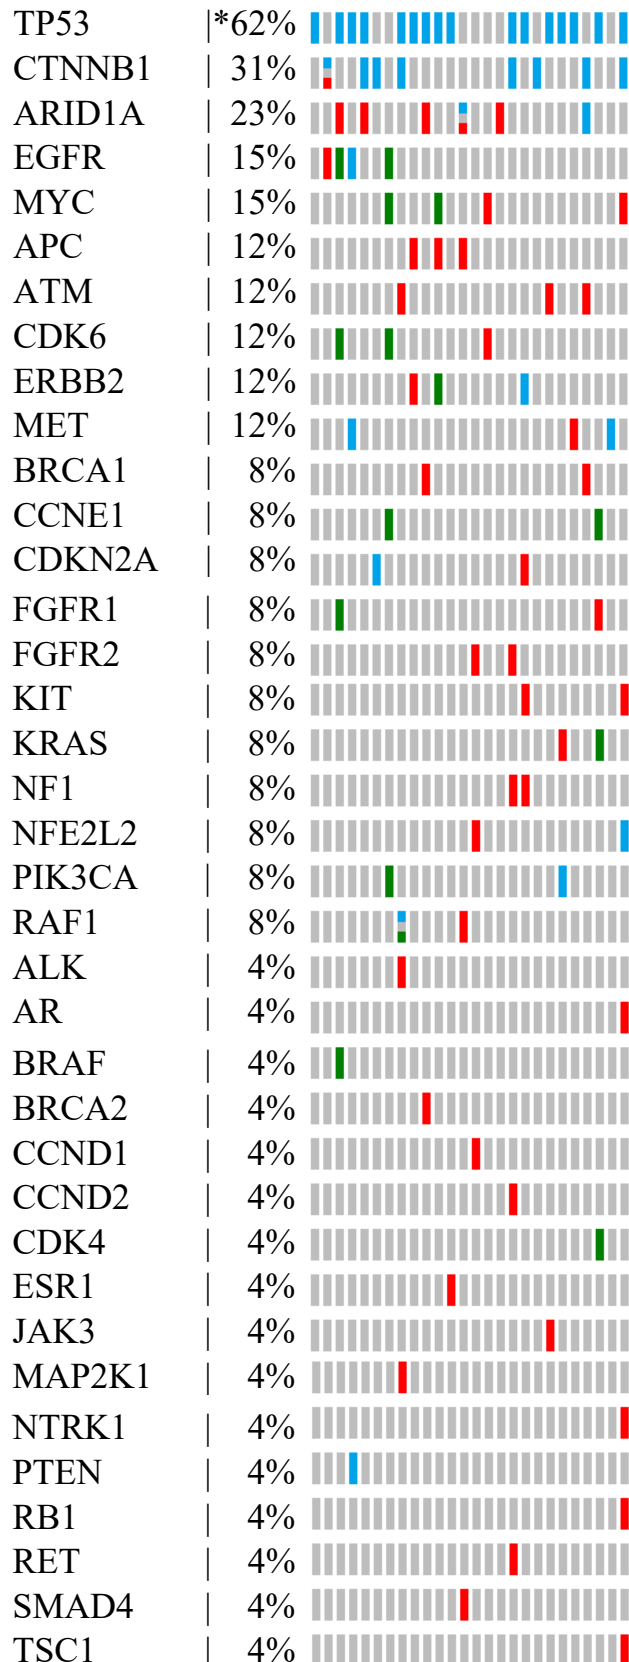

\*Percentages represent the number of patients that exhibited at least one of the respective mutation out of 26 patients with HCC.

**Genetic Alteration**      █ Characterized Mutation      █ VUS      █ Amplification
